# Supplementary material
Source: PubMed Central journal article supplement (PMC5710338)

## Supplementary Online Content

Norman M, Piedvache A, Børch K, et al. Association of short antenatal corticosteroid administration-to-birth intervals with survival and morbidity among very preterm infants: results from the EPICE cohort. *JAMA Pediatr*. Published online May 15, 2017. doi:10.1001/jamapediatrics.2017.0602

**eTable 1.** Maternity unit protocols for the first course of antenatal corticosteroids

**eTable 2.** Characteristics of included infants and those excluded because of missing information on timing of antenatal corticosteroids (ANS)

**eTable 3.** Simulation of in-hospital mortality if providing ANS hours before delivery to infants who did not receive ANS (n = 661)

**eFigure 1.** Cumulative distribution of administration-to-birth intervals of antenatal corticosteroids (ANS) for very preterm birth (delivered livebirths only)

**eFigure 2.** Administration of antenatal corticosteroids and administration-to-birth intervals (colored) by European region

**eFigure 3.** Association between timing of antenatal corticosteroids (ANS) and a composite of in-hospital mortality or severe neonatal morbidity

This supplementary material has been provided by the authors to give readers additional information about their work.

**eTable 1.** Maternity unit protocols for the first course of antenatal corticosteroids

|                         | Number of Units | Drug used     |               |          | Administration protocol |                     |                                                 |
|-------------------------|-----------------|---------------|---------------|----------|-------------------------|---------------------|-------------------------------------------------|
|                         |                 | Betamethasone | Dexamethasone | Both     | 2 x 12 mg, 24 hours     | 2 x 12 mg, 12 hours | Other                                           |
| BE:Flanders             | 9               | 7             | 0             | 2        | 5                       | 2                   | 2x8 mg, 12 h (1 unit)<br>2x12 mg, NA h (1 unit) |
| DK:Eastern              | 8               | 8             | 0             | 0        | 8                       | 0                   |                                                 |
| Estonia                 | 2               | 2             | 0             | 0        | 1                       | 1                   |                                                 |
| FR:Northern             | 6               | 6             | 0             | 0        | 6                       | 0                   |                                                 |
| FR:Burgundy             | 1               | 1             | 0             | 0        | 1                       | 0                   |                                                 |
| FR:IDF*                 | 15              | 12            | 2             | 0        | 14                      | 1                   |                                                 |
| DE:Hesse                | 11              | 9             | 0             | 2        | 11                      | 0                   |                                                 |
| DE:Saarland             | 2               | 2             | 0             | 0        | 1                       | 1                   |                                                 |
| IT:Lazio                | 10              | 10            | 0             | 0        | 9                       | 1                   |                                                 |
| IT:Emilia               | 9               | 9             | 0             | 0        | 9                       | 0                   |                                                 |
| IT:Marche               | 2               | 2             | 0             | 0        | 2                       | 0                   |                                                 |
| NL:East-Central         | 2               | 1             | 0             | 1        | 2                       | 0                   |                                                 |
| PL:Wielkopolska         | 4               | 2             | 1             | 1        | 2                       | 2                   |                                                 |
| PT:Northern             | 9               | 5             | 2             | 2        | 7                       | 0                   | 4x6 mg, 12 h (2 units)                          |
| PT:Lisbon               | 8               | 8             | 0             | 0        | 8                       | 0                   |                                                 |
| UK:Northern             | 4               | 3             | 0             | 1        | 4                       | 0                   |                                                 |
| UK:East Midlands        | 8               | 3             | 1             | 4        | 5                       | 2                   | 2x9 mg, 24 h (1 unit)                           |
| UK:Yorkshire and Humber | 8               | 2             | 0             | 6        | 5                       | 3                   |                                                 |
| SE:Stockholm            | 5               | 5             | 0             | 0        | 5                       | 0                   |                                                 |
| Total                   | 123             | 97 (79%)      | 6 (5%)        | 19 (15%) | 105 (85%)               | 13 (11%)            | 5 (4%)                                          |

**eTable 2.** Characteristics of included infants and those excluded because of missing information on timing of antenatal corticosteroids (ANS)

|                                              | <b>Study population</b> | <b>No information on timing of ANS</b> | <b>P-value</b> | <b>P-value adjusted on region</b> |
|----------------------------------------------|-------------------------|----------------------------------------|----------------|-----------------------------------|
|                                              | n=4594                  | n=362                                  |                |                                   |
| <b>Infant characteristics</b>                |                         |                                        |                |                                   |
| Gestational age, weeks [mean(sd)]            | 28.5 (2.2)              | 28.5 (2.1)                             | 0.93#          | 0.42                              |
| <b>SGA</b>                                   |                         |                                        |                |                                   |
| <3rd centile                                 | 1019 (22.2)             | 102 (28.3)                             | 0.03           | 0.05                              |
| 3-10th                                       | 465 (10.1)              | 35 (9.7)                               |                |                                   |
| >10th                                        | 3109 (67.7)             | 223 (61.9)                             |                |                                   |
| <b>Sex</b>                                   |                         |                                        |                |                                   |
| Male                                         | 2496 (54.3)             | 197 (54.6)                             | 0.93           | 0.76                              |
| Female                                       | 2097 (45.7)             | 164 (45.4)                             |                |                                   |
| <b>Surfactant &lt;2h after birth</b>         |                         |                                        |                |                                   |
| No                                           | 2510 (56.7)             | 162 (56.5)                             | 0.93           | 0.38                              |
| Yes                                          | 1915 (43.3)             | 125 (43.6)                             |                |                                   |
| <b>Maternal characteristics</b>              |                         |                                        |                |                                   |
| Age, yrs [mean(sd)]                          | 30.0 (6.2)              | 30.0 (6.3)                             | 0.95#          | 0.49                              |
| <b>Parity</b>                                |                         |                                        |                |                                   |
| Primiparous                                  | 2469 (54.2)             | 172 (49.9)                             | 0.12           | 0.13                              |
| Multiparous                                  | 2085 (45.8)             | 173 (50.1)                             |                |                                   |
| <b>Preeclampsia, eclampsia, HELLP</b>        |                         |                                        |                |                                   |
| No                                           | 3642 (80.3)             | 213 (75)                               | 0.03           | <0.001                            |
| Yes                                          | 894 (19.7)              | 71 (25)                                |                |                                   |
| <b>Preterm prelabor rupture of membranes</b> |                         |                                        |                |                                   |
| No                                           | 3357 (74)               | 193 (67.7)                             | 0.02           | 0.16                              |
| Yes                                          | 1182 (26)               | 92 (32.3)                              |                |                                   |
| <b>Delivery onset</b>                        |                         |                                        |                |                                   |
| Spontaneous/induced                          | 2501 (55)               | 176 (51)                               | 0.15           | 0.02                              |
| Cesarean                                     | 2045 (45)               | 169 (49)                               |                |                                   |
| <b>Mode of delivery</b>                      |                         |                                        |                |                                   |
| Vaginal                                      | 1634 (35.9)             | 92 (25.9)                              | <0.001         | 0.01                              |
| Cesarean                                     | 2919 (64.1)             | 263 (74.1)                             |                |                                   |
| <b>Delivery at level III unit</b>            |                         |                                        |                |                                   |
| No                                           | 1106 (24.1)             | 105 (29)                               | 0.04           | 0.01                              |
| Yes                                          | 3483 (75.9)             | 257 (71)                               |                |                                   |
| <b>Delivery on day of admission</b>          |                         |                                        |                |                                   |
| No                                           | 1089 (24.6)             | 57 (24.3)                              | 0.78           | 0.47                              |
| Yes                                          | 3335 (75.4)             | 178 (75.7)                             |                |                                   |

| <b>Region</b>         |            |            |        |  |
|-----------------------|------------|------------|--------|--|
| BE:Flanders           | 429 (9.3)  | 8 (2.2)    | <0.001 |  |
| DK:Eastern            | 182 (4)    | 12 (3.3)   |        |  |
| Estonia               | 112 (2.4)  | 1 (0.3)    |        |  |
| FR:Northern           | 169 (3.7)  | 1 (0.3)    |        |  |
| FR:Burgundy           | 56 (1.2)   | 1 (0.3)    |        |  |
| FR:IDF                | 543 (11.8) | 17 (4.7)   |        |  |
| DE:Hesse              | 233 (5.1)  | 103 (28.5) |        |  |
| DE:Saarland           | 55 (1.2)   | 26 (7.2)   |        |  |
| IT:Lazio              | 314 (6.8)  | 17 (4.7)   |        |  |
| IT:Emilia             | 263 (5.7)  | 11 (3)     |        |  |
| IT:Marche             | 76 (1.7)   | 0 (0)      |        |  |
| NL:East-Central       | 240 (5.2)  | 7 (1.9)    |        |  |
| PL:Wielkopolska       | 194 (4.2)  | 5 (1.4)    |        |  |
| PT:Northern           | 187 (4.1)  | 3 (0.8)    |        |  |
| PT:Lisbon             | 291 (6.3)  | 3 (0.8)    |        |  |
| UK:Northern           | 238 (5.2)  | 52 (14.4)  |        |  |
| UK:East Midlands      | 384 (8.4)  | 17 (4.7)   |        |  |
| UK:Yorkshire & Humber | 457 (10)   | 77 (21.3)  |        |  |
| SE:Stockholm          | 171 (3.7)  | 1 (0.3)    |        |  |

Data are numbers (%) if not stated otherwise.

# Kruskal-Wallis test.

**eTable 3.** Simulation of in-hospital mortality if providing ANS hours before delivery to infants who did not receive ANS (n = 661)

| <b>Simulations</b>                 | <b>In-hospital mortality</b> | <b>In-hospital mortality or severe neonatal morbidity<sup>1</sup></b> |
|------------------------------------|------------------------------|-----------------------------------------------------------------------|
| <b>No ANS (observed situation)</b> |                              |                                                                       |
| Observed events (n)                | 114                          | 177                                                                   |
| Predicted events (n)               | 114                          | 177                                                                   |
| <b>If ANS &lt;3hrs</b>             |                              |                                                                       |
| Predicted events (n)               | 84                           | 139                                                                   |
| Reduction in events (n)            | 30                           | 38                                                                    |
| % reduction                        | 26%                          | 21%                                                                   |
| <b>If ANS 3-5 hours</b>            |                              |                                                                       |
| Predicted events (n)               | 72                           | 134                                                                   |
| Reduction in events (n)            | 42                           | 43                                                                    |
| % reduction                        | 37%                          | 24%                                                                   |
| <b>If ANS 6-12 hours</b>           |                              |                                                                       |
| Predicted events (n)               | 56                           | 132                                                                   |
| Reduction in events (n)            | 58                           | 45                                                                    |
| % reduction                        | 51%                          | 25%                                                                   |

NOTES: <sup>1</sup>severe neonatal morbidity includes: intraventricular hemorrhage (IVH) grade  $\geq 3$ , cystic periventricular leukomalacia (cPVL), surgical necrotizing enterocolitis or retinopathy of prematurity stage  $\geq 3$

**eFigure 1.** Cumulative distribution of administration-to-birth intervals of antenatal corticosteroids (ANS) for very preterm birth (delivered livebirths only)

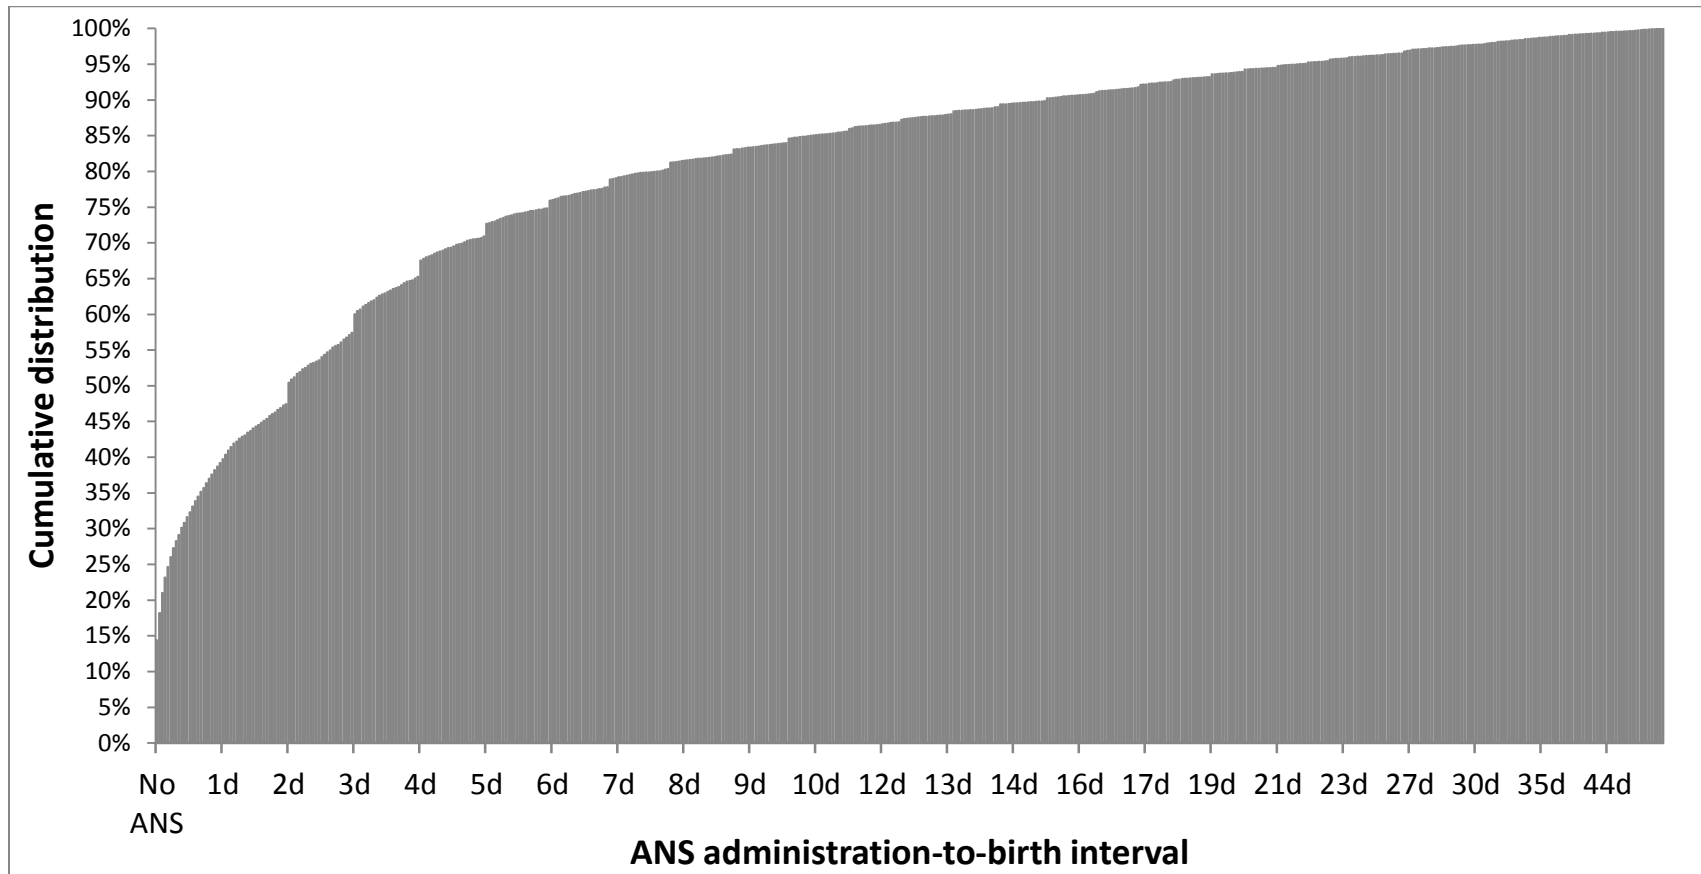

**eFigure 2.** Administration of antenatal corticosteroids and administration-to-birth intervals (colored) by European region

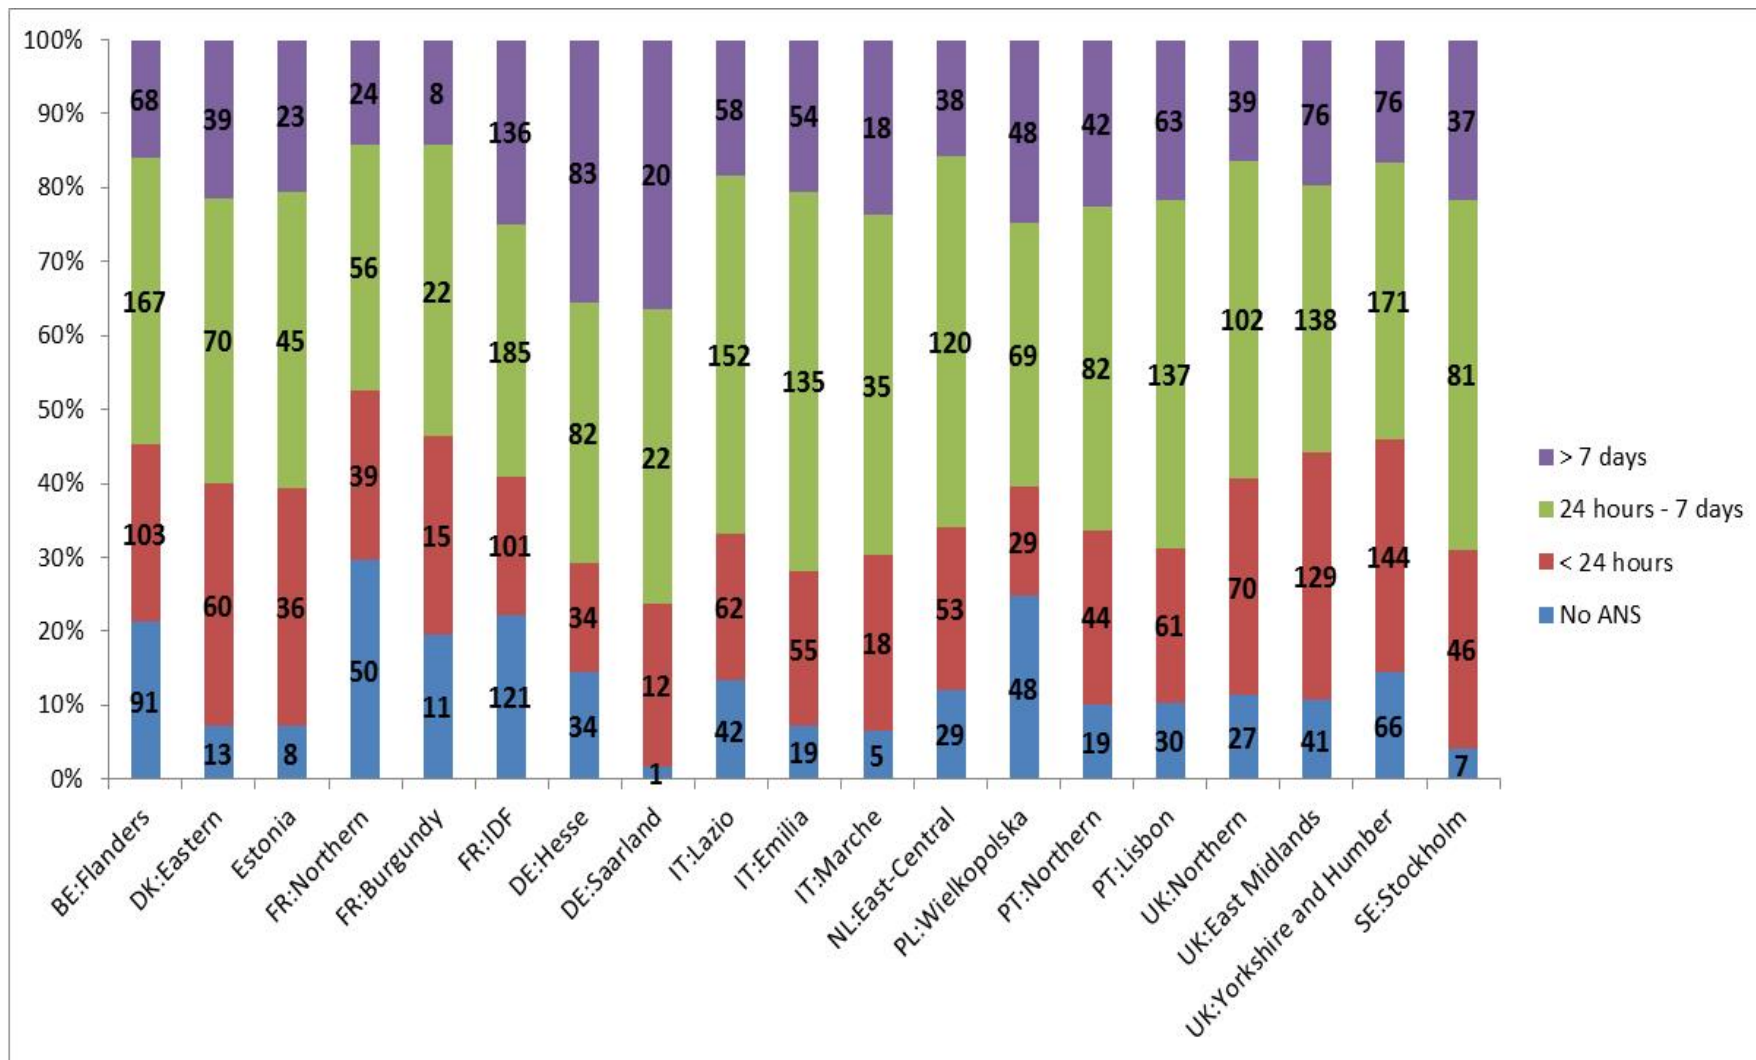

**eFigure 3.** Association between timing of antenatal corticosteroids (ANS) and a composite of in-hospital mortality or severe neonatal morbidity

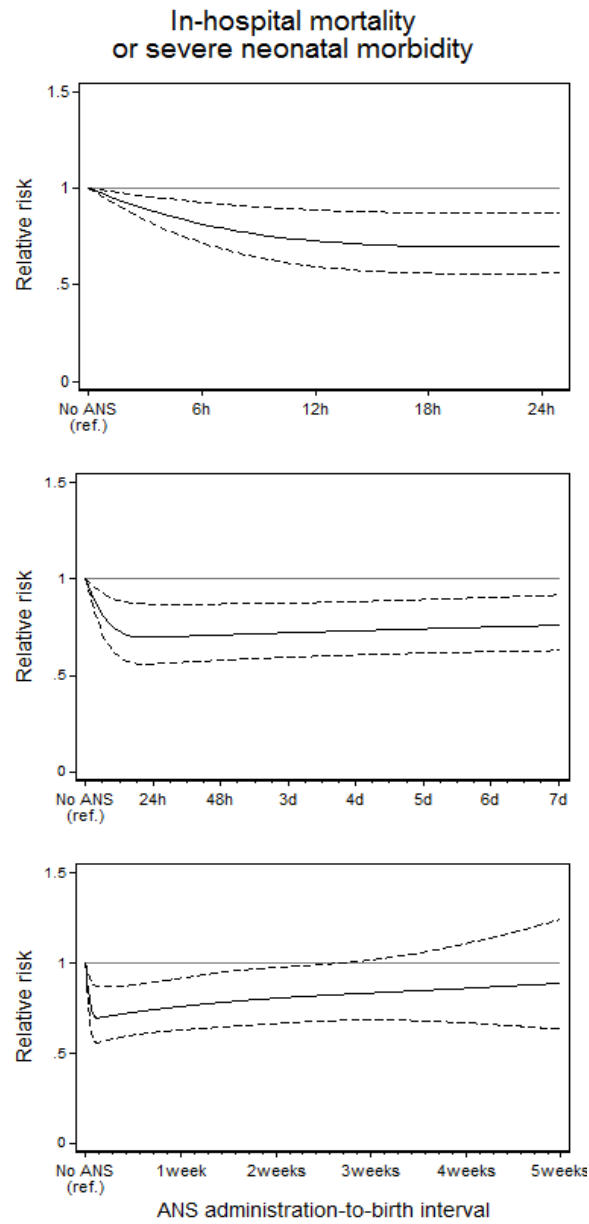

Supplement: jamapediatr-171-678-s001.pdf [file jamapediatr-171-678-s001.pdf]
